# Supplementary material for: Identification of Three Viruses Infecting Mulberry Varieties
Source: MDPI journal article supplement (doi:10.3390/v14112564), 2022-11-19
Supplement: s1 [file s1]

**Table S1.** The primers of RACE

| Name             | Primer sequences <sup>1</sup>                     |       |
|------------------|---------------------------------------------------|-------|
| 10×UPM           | CTAATACGACTCACTATAGGGCAAGCAGTGGTATCAACGCAGAG<br>T |       |
| CLBV2-5UTR-R     | <u>GATTACGCCAAGCTT</u> CATAACTACGGAATCGATC        | } GSP |
| CLBV2-5UTR-R1    | CCCTTCTCTCCACCTCAACAACCAGCG                       |       |
| CLBV2-3UTR-F     | <u>GATTACGCCAAGCTT</u> GGATCAAGGAGTACATCAGACA     |       |
| CLBV2-3UTR-F1    | GGCGGGTGCTGAGGCGGAAGAT                            |       |
| M13-F            | CAGGGTTTTCCCAGTCACG                               |       |
| M13-R            | GAGCGGATAACAATTTTCACAC                            |       |
| CLBV2-RdRp-det-F | GAAGATAGTGTCAATGCATTTG                            |       |
| CLBV2-RdRp-det-R | CCAGCCACAAAACATCGGGCTC                            |       |
| MaTLV-RdRp-det-F | AGCGACAAAAATTTTCTTCATCC                           |       |
| MaTLV-RdRp-det-R | CGCGCGAAGGAAAAAACCTACG                            |       |
| MaNLV-RdRp-det-F | GTATCACCAAGGTAATTCTTACC                           |       |
| MaNLV-RdRp-det-R | ATCACCGCTCACCAAGAGAACG                            |       |

<sup>1</sup> the 15 bp overlaps with the pUC19 vector.

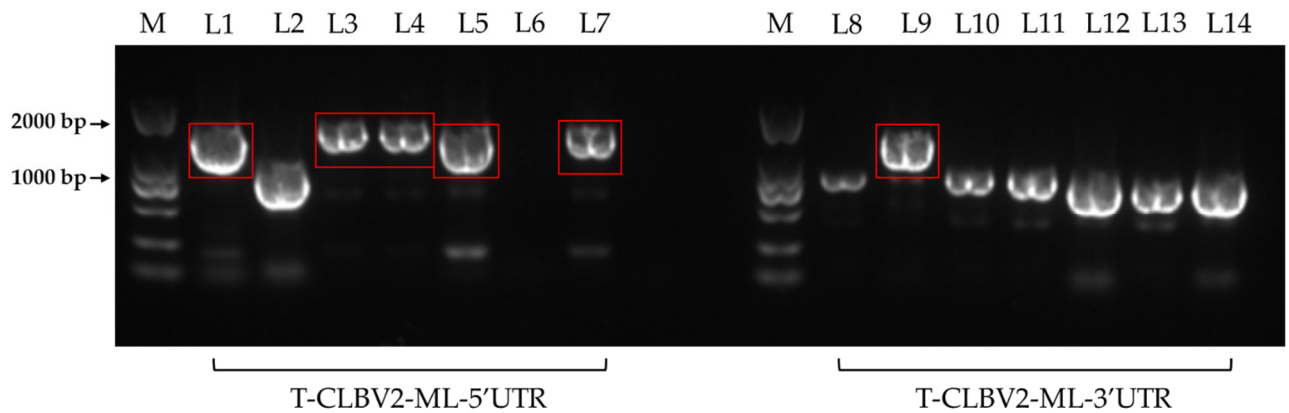

**Figure S1.** The detection of positive clones; M was Marker, Lane 1-7 were the positive clones of 5' terminal sequences, Lane 8-14 were the positive clones of 3' terminal sequences; The stripes in the red boxes maybe the destination stripe.

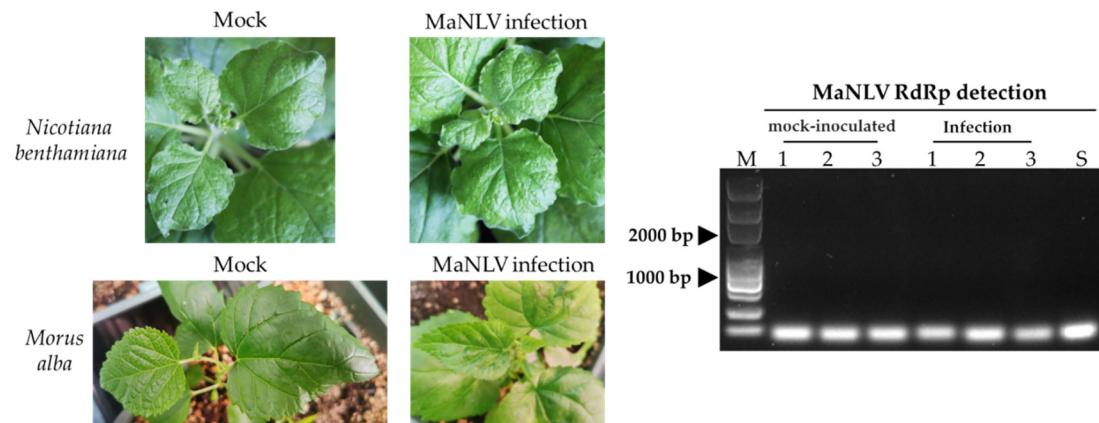

**Figure S2.** Symptoms on leaves of *Nicotiana benthamiana* and *Morus alba* infected by MaNLV, and virus detection. Lane 1 and 2, *N. benthamiana*; Lane 3, *Morus alba*; m1-3, mock-inoculated leaves; i1-3, the infection of leaves; S, sample cDNA.
