# Supplementary material for: Identification of Three Viruses Infecting Mulberry Varieties
Source: Viruses. 2022 Nov 19;14(11):2564. doi: 10.3390/v14112564 (PMC9696721; doi:10.3390/v14112564)
Supplement: Supplementary file 1 [file viruses-14-02564-s001.zip › Table S2. The results of MaNVL RdRp blastp.csv]

Table S2 The results of MaNLV RdRp proteins blastp
Description	Scientific Name	Max Score	Total Score	Query Cover	E value	Per. ident	Acc. Len	Accession
putative RNA-dependent RNA polymerase [Narnaviridae sp.]	Narnaviridae sp.	1827	1827	92%	0	83.11	1045	UJQ92638.1
RNA-dependent RNA polymerase [Beihai narna-like virus 23]	Beihai narna-like virus 23	721	721	66%	0	48.95	759	YP_009333261.1
RNA dependent RNA polymerase [Narnaviridae sp.]	Narnaviridae sp.	710	710	35%	0	85.64	398	URG16978.1
putative RNA-dependent RNA polymerase [Narnaviridae sp.]	Narnaviridae sp.	669	669	83%	0	39.94	1018	UJQ92701.1
RNA-dependent RNA polymerase [Plasmopara viticola lesion associated narnavirus 14]	Plasmopara viticola lesion associated narnavirus 14	648	648	91%	0	37.71	1023	QIR30293.1
RNA-dependent RNA polymerase [Neofusicoccum parvum narnavirus 1]	Neofusicoccum parvum narnavirus 1	643	643	91%	0	37.15	1023	QDB74994.1
RNA dependent RNA polymerase [Ustilaginoidea virens narna-like virus 3]	Ustilaginoidea virens narna-like virus 3	595	595	84%	0	37.44	1015	UVX28911.1
RNA-dependent RNA polymerase [Erysiphe necator associated narnavirus 48]	Erysiphe necator associated narnavirus 48	595	595	87%	0	36.77	1011	QJT93780.1
RNA-dependent RNA polymerase [Erysiphe necator associated narnavirus 8]	Erysiphe necator associated narnavirus 8	589	589	91%	0	36.23	1129	QJT93740.1
RNA-dependent RNA polymerase [Hangzhou narnavirus 5]	Hangzhou narnavirus 5	469	469	90%	2.00E-142	32.85	1105	UHK03010.1
RNA-dependent RNA polymerase [Riboviria sp.]	Riboviria sp.	447	447	93%	7.00E-135	32.38	1078	QTW97841.1
RNA-dependent RNA polymerase [Plasmopara viticola lesion associated narnavirus 29]	Plasmopara viticola lesion associated narnavirus 29	440	440	87%	1.00E-131	30.77	1124	QIR30308.1
RNA-dependent RNA polymerase [Erysiphe necator associated narnavirus 15]	Erysiphe necator associated narnavirus 15	439	439	87%	3.00E-131	30.8	1121	QJT93747.1
RNA-dependent RNA polymerase [Plasmopara viticola lesion associated narnavirus 30]	Plasmopara viticola lesion associated narnavirus 30	438	438	87%	7.00E-131	30.44	1121	QIR30309.1
RNA-dependent RNA polymerase [Erysiphe necator associated narnavirus 39]	Erysiphe necator associated narnavirus 39	411	411	87%	7.00E-121	29.5	1115	QJT93771.1
RNA dependent RNA polymerase [Narnaviridae sp.]	Narnaviridae sp.	380	380	39%	7.00E-117	46.89	446	URG16985.1
RNA-dependent RNA polymerase [Riboviria sp.]	Riboviria sp.	386	386	82%	5.00E-112	29.57	1089	QTW97840.1
RNA-dependent RNA polymerase [Plasmopara viticola lesion associated narnavirus 13]	Plasmopara viticola lesion associated narnavirus 13	384	384	77%	9.00E-112	30.77	1044	QIR30292.1
RdRp [Wilkie narna-like virus 2]	Wilkie narna-like virus 2	381	381	87%	2.00E-110	30.37	1068	YP_009388579.1
RNA-dependent RNA polymerase [Beihai narna-like virus 22]	Beihai narna-like virus 22	374	374	84%	4.00E-108	29.97	1027	YP_009333139.1
RNA dependent RNA polymerase [Narnaviridae sp.]	Narnaviridae sp.	327	327	36%	1.00E-97	44.47	409	URG17005.1
putative replicase [Cunsystermes virus]	Cunsystermes virus	256	256	58%	2.00E-65	26.77	2041	QRW42897.1
putative replicase [Cunsystermes virus]	Cunsystermes virus	256	256	58%	3.00E-65	26.77	2041	QRW42893.1
RNA dependent RNA polymerase [Narnaviridae sp.]	Narnaviridae sp.	218	218	32%	7.00E-59	38.59	339	URG16997.1
RNA-dependent RNA polymerase [Aspergillus creber narnavirus 1]	Aspergillus creber narnavirus 1	134	134	53%	2.00E-27	23.82	1076	BDB16246.1
RNA-dependent RNA polymerase [Plasmopara viticola lesion associated narnavirus 12]	Plasmopara viticola lesion associated narnavirus 12	130	130	55%	3.00E-26	24.25	1078	QIR30291.1
RNA-dependent RNA polymerase [Plasmopara viticola lesion associated narnavirus 35]	Plasmopara viticola lesion associated narnavirus 35	128	128	58%	1.00E-25	23.14	1078	QIR30314.1
RNA-dependent RNA polymerase [Plasmopara viticola lesion associated narnavirus 34]	Plasmopara viticola lesion associated narnavirus 34	125	125	58%	7.00E-25	24.57	1079	QIR30313.1
RNA dependent RNA polymerase [Ustilaginoidea virens narna-like virus 2]	Ustilaginoidea virens narna-like virus 2	112	112	21%	2.00E-23	31.97	229	UVX28910.1
RNA-dependent RNA polymerase [Guiyang Paspalum thunbergii narna-like virus 1]	Guiyang Paspalum thunbergii narna-like virus 1	115	115	52%	1.00E-21	22.44	1072	UUW20993.1
RNA-dependent RNA polymerase [Plasmopara viticola lesion associated narnavirus 31]	Plasmopara viticola lesion associated narnavirus 31	114	114	56%	2.00E-21	23.56	1104	QIR30310.1
RNA-dependent RNA polymerase [Plasmopara viticola lesion associated narnavirus 37]	Plasmopara viticola lesion associated narnavirus 37	114	114	52%	3.00E-21	23.03	1055	QIR30316.1
RNA-dependent RNA polymerase [Erysiphe necator associated narnavirus 25]	Erysiphe necator associated narnavirus 25	112	112	53%	1.00E-20	23.57	1062	QJT93757.1
RNA-dependent RNA polymerase [Plasmopara viticola lesion associated narnavirus 11]	Plasmopara viticola lesion associated narnavirus 11	102	102	54%	1.00E-17	24.04	1090	QIR30290.1
RNA-dependent RNA polymerase [Aspergillus flavus narnavirus 2]	Aspergillus flavus narnavirus 2	98.6	98.6	51%	2.00E-16	23.87	1092	UAW09568.1
RNA-dependent RNA polymerase [Plasmopara viticola lesion associated narnavirus 36]	Plasmopara viticola lesion associated narnavirus 36	97.1	97.1	52%	5.00E-16	22.31	1064	QIR30315.1
RNA-dependent RNA polymerase [Erysiphe necator associated narnavirus 27]	Erysiphe necator associated narnavirus 27	81.3	81.3	53%	4.00E-11	20.12	1089	QJT93759.1
hypothetical protein [Beihai narna-like virus 23]	Beihai narna-like virus 23	66.2	66.2	18%	1.00E-07	28.18	235	YP_009333262.1
RNA-dependent RNA polymerase [Plasmopara viticola lesion associated narnavirus 5]	Plasmopara viticola lesion associated narnavirus 5	66.6	66.6	37%	8.00E-07	22.72	650	QIR30284.1
RNA-dependent RNA polymerase [Neofusicoccum parvum narnavirus 3]	Neofusicoccum parvum narnavirus 3	65.5	65.5	36%	2.00E-06	26.12	638	QTE76053.1
hypothetical protein GmHk_01G001978 [Glycine max]	Glycine max	61.2	61.2	9%	5.00E-06	36.11	218	KAH1266489.1
RdRp [Erysiphe necator associated narnavirus 5]	Erysiphe necator associated narnavirus 5	61.6	61.6	37%	3.00E-05	23.96	640	QHD64828.1
RNA-dependent RNA polymerase [Rhizoctonia solani narnavirus 4]	Rhizoctonia solani narnavirus 4	59.3	59.3	28%	2.00E-04	20.91	775	UIW13846.1
RNA-dependent RNA polymerase [Aspergillus fumigatus narnavirus 2]	Aspergillus fumigatus narnavirus 2	58.2	58.2	41%	3.00E-04	22.76	626	BCH36627.1
RNA-dependent RNA polymerase [Aspergillus fumigatus narnavirus 2]	Aspergillus fumigatus narnavirus 2	57.8	57.8	41%	4.00E-04	22.8	626	BCH36633.1
RNA-dependent RNA polymerase [Aspergillus fumigatus narnavirus 2]	Aspergillus fumigatus narnavirus 2	57.4	57.4	41%	6.00E-04	22.8	626	BCH36622.1
RNA-dependent RNA polymerase [Aspergillus fumigatus narnavirus 2]	Aspergillus fumigatus narnavirus 2	56.6	56.6	41%	0.001	22.57	626	AXE72934.1
RNA-dependent RNA polymerase [Aspergillus fumigatus narnavirus 2]	Aspergillus fumigatus narnavirus 2	56.2	56.2	41%	0.001	22.57	626	BDF97671.1
putative RNA-dependent RNA polymerase [Cryphonectria naterciae splipalmivirus 1]	Cryphonectria naterciae splipalmivirus 1	55.5	55.5	37%	0.003	23.63	642	BCX55509.1
RNA-dependent RNA polymerase [Plasmopara viticola lesion associated narnavirus 6]	Plasmopara viticola lesion associated narnavirus 6	54.3	54.3	16%	0.006	28.72	621	QIR30285.1
RNA-dependent RNA polymerase [XiangYun narna-levi-like virus 11]	XiangYun narna-levi-like virus 11	53.9	53.9	23%	0.01	27.33	980	UUG74244.1
